# Supplementary material for: The metallome of the human placenta in gestational diabetes mellitus
Source: Royal Society of Chemistry journal article supplement (doi:10.1039/c5mt00050e), 2015-04-16
Supplement: c5mt00050e1.pdf [file c5mt00050e1.pdf]

## The metallome of human placenta in gestational diabetes mellitus

Marco Roverso,<sup>a,b</sup> Chiara Berté,<sup>a</sup> Valerio Di Marco,<sup>\*a</sup> Annunziata Lapolla,<sup>b</sup> Denis Badocco,<sup>a</sup> Paolo Pastore,<sup>a</sup> Silvia Visentin<sup>c</sup> and Erich Cosmi<sup>c</sup>

### supporting information

Table S1: Detection limits given as ppm per dry weight (d.w.) of placenta.

| Elem. | Detection limit | Elem. | Detection limit | Elem. | Detection limit |
|-------|-----------------|-------|-----------------|-------|-----------------|
| Al    | 1.4             | Fe    | 0.88            | Pb    | 0.069           |
| As    | 0.015           | Ga    | 0.047           | Rb    | 0.022           |
| B     | 2.7             | Gd    | 0.0089          | Sb    | 0.33            |
| Ba    | 0.43            | K     | 5.2             | Se    | 0.14            |
| Ca    | 7.6             | La    | 0.012           | Sn    | 0.093           |
| Cd    | 0.0091          | Mg    | 1.3             | Sr    | 0.039           |
| Ce    | 0.012           | Mn    | 0.038           | Ta    | 0.050           |
| Co    | 0.014           | Mo    | 0.013           | Ti    | 0.19            |
| Cr    | 0.31            | Na    | 3.1             | V     | 0.012           |
| Cs    | 0.0073          | Ni    | 0.17            | Zn    | 0.85            |
| Cu    | 0.097           | P     | 9.3             | Zr    | 0.13            |

Table S2: analytical recoveries obtained in the ICP-MS analyses of placentas.

| Elem. | %Rec. | Elem. | %Rec. | Elem. | %Rec. |
|-------|-------|-------|-------|-------|-------|
| Al    | 102   | Hf    | 109   | Sb    | 104   |
| As    | 102   | Ho    | 100   | Se    | 113   |
| Ba    | 98    | K     | 121   | Sm    | 102   |
| Be    | 98    | La    | 100   | Sn    | 101   |
| Ca    | 109   | Mg    | 99    | Sr    | 100   |
| Cd    | 100   | Mn    | 100   | Ta    | 105   |
| Ce    | 100   | Mo    | 102   | Th    | 98    |
| Co    | 100   | Na    | 99    | Ti    | 74    |
| Cr    | 96    | Nb    | 104   | Tl    | 93    |
| Cs    | 100   | Nd    | 102   | Tm    | 100   |
| Cu    | 113   | Ni    | 103   | U     | 97    |
| Dy    | 100   | P     | 390   | V     | 97    |
| Er    | 100   | Pb    | 90    | W     | 104   |
| Eu    | 101   | Pr    | 100   | Yb    | 99    |
| Fe    | 102   | Rb    | 114   | Zn    | 110   |
| Ga    | 104   | Re    | 106   | Zr    | 102   |
| Gd    | 99    |       |       |       |       |

<sup>a</sup> Department of Chemical Sciences, University of Padova, via Marzolo 1, 35131 Padova, Italy. Tel: +390498275219, E-mail: valerio.dimarco@unipd.it.

<sup>b</sup> Department of Medicine, University of Padova, via Giustiniani 2, 35128 Padova, Italy.

<sup>c</sup> Department of Woman's and Child's Health, University of Padova, via Giustiniani 2, 35128 Padova, Italy.

Table S3: instrumental errors, errors related to the procedure, and errors related to procedure and sampling (given as ppm d.w. mean standard deviation).

| Elem. | Instrum. error | Procedure error | Procedure and sampling error |
|-------|----------------|-----------------|------------------------------|
| Al    | 0.066          | 4.9             | 12                           |
| Ca    | 4.2            | 88              | 580                          |
| Cd    | 0.0014         | 0.0014          | 0.0032                       |
| Co    |                |                 | 0.072                        |
| Cu    | 0.010          | 0.13            | 0.062                        |
| Fe    | 1.2            | 37              | 14                           |
| K     | 14             | 330             | 570                          |
| Mg    | 1.2            | 19              | 28                           |
| Mn    | 0.0022         | 0.035           | 0.047                        |
| Na    | 11             | 130             | 150                          |
| P     | 29             | 510             | 670                          |
| Rb    | 0.024          | 0.56            | 0.85                         |
| Sb    | 0.0037         |                 |                              |
| Se    | 0.0094         | 0.025           | 0.039                        |
| Sr    | 0.0031         | 0.044           | 0.14                         |
| Ti    | 0.016          | 0.19            | 0.044                        |
| Zn    | 0.16           | 1.6             | 2.7                          |
| Zr    |                |                 | 0.074                        |

Table S4: Statistical comparison of the elemental concentration between maternal and fetal side in each of the five analyses performed on the placenta samples.

| Element | analysis |      |         |      |         |      |         |      |         |      |
|---------|----------|------|---------|------|---------|------|---------|------|---------|------|
|         | 1        |      | 2       |      | 3       |      | 4       |      | 5       |      |
|         | control  | GDM  | control | GDM  | control | GDM  | control | GDM  | control | GDM  |
| Al      | ////     | //// |         |      |         |      |         | 97.5 |         |      |
| As      | ////     | //// |         |      |         |      | ////    | //// | ////    | //// |
| Ba      | ////     | //// | ////    | //// | ////    | //// | ////    | //// | ////    | //// |
| Ca      | ////     | //// |         | 96.9 |         |      |         |      | 96.2    |      |
| Cd      | 95.1     |      |         |      |         |      |         |      |         |      |
| Ce      | ////     | //// | ////    | //// | ////    | //// |         |      | ////    | //// |
| Co      | ////     | //// |         |      |         |      | ////    | //// | ////    | //// |
| Cr      |          |      |         |      |         |      | ////    | //// | ////    | //// |
| Cs      |          |      |         |      | 99.0    |      |         |      | ////    | //// |
| Cu      |          |      |         |      |         |      |         |      |         |      |
| Fe      |          |      |         |      |         |      | 97.5    |      | 99.7    |      |
| Ga      | ////     | //// | ////    | //// | ////    | //// | ////    | //// | ////    | //// |
| Gd      | ////     | //// | ////    | //// | ////    | //// | ////    | //// | ////    | //// |
| K       | 99.0     |      |         |      | 96.2    |      |         |      |         |      |
| La      | ////     | //// | ////    | //// | ////    | //// |         |      | ////    | //// |
| Mg      |          |      |         |      |         |      |         |      | 98.6    |      |
| Mn      | ////     | //// |         |      |         |      |         |      |         |      |
| Mo      | ////     | //// | ////    | //// | ////    | //// | ////    | //// | ////    | //// |
| Na      | 95.1     |      |         |      |         | 97.1 |         |      |         |      |
| Ni      | ////     | //// | ////    | //// | ////    | //// | ////    | //// | ////    | //// |
| P       |          |      |         |      |         |      |         |      | 98.5    |      |
| Pb      | ////     | //// |         |      |         |      | ////    | //// | ////    | //// |
| Rb      | 99.1     |      |         |      | 97.5    |      |         |      |         |      |
| Se      |          |      |         |      |         | 95.8 |         |      | 99.7    |      |
| Sn      | ////     | //// | ////    | //// | ////    | //// | ////    | //// | ////    | //// |
| Sr      | ////     | //// |         | 97.0 |         |      |         |      | 95.6    |      |
| Ta      | ////     | //// | ////    | //// | ////    | //// | ////    | //// | ////    | //// |
| Ti      | ////     | //// |         |      |         |      |         |      |         |      |
| Tl      | ////     | //// | ////    | //// | ////    | //// | ////    | //// | ////    | //// |
| V       | ////     | //// |         |      | ////    | //// | ////    | //// | ////    | //// |
| Zn      |          |      |         |      |         |      |         |      | 96.8    |      |
| Zr      | ////     | //// |         |      |         |      |         |      |         |      |

//// No test can be performed  
  negative test  
  positive test ((1 - p)% value)

Table S5: Statistical comparison of the elemental concentration between diabetic and control women in each of the five analyses performed on the placenta samples.

| Element | Analisi    |            |            |            |            |
|---------|------------|------------|------------|------------|------------|
|         | 1          | 2          | 3          | 4          | 5          |
| Al      | ////       |            | test M. W. | test M. W. | test M. W. |
| As      | ////       |            |            |            | ////       |
| Ba      | ////       | ////       | ////       | ////       | ////       |
| Ca      | ////       |            |            |            |            |
| Cd      | test M. W. | test M. W. | test t     | test t     |            |
| Ce      | ////       | ////       | ////       |            | ////       |
| Co      | ////       |            | both tests | ////       | ////       |
| Cr      | test t     |            | test M. W. |            | ////       |
| Cs      | both tests |            |            | test M. W. | test M. W. |
| Cu      |            |            |            | test t     |            |
| Fe      | both tests |            |            |            |            |
| Ga      | ////       | ////       |            |            | ////       |
| Gd      | ////       | ////       | ////       | ////       | ////       |
| K       |            |            | both tests |            |            |
| La      | ////       | ////       | ////       |            | ////       |
| Mg      |            |            | test M. W. |            | test t     |
| Mn      | ////       |            |            |            |            |
| Mo      | ////       | ////       | ////       | ////       | ////       |
| Na      |            |            |            |            |            |
| Ni      | ////       | ////       | ////       | ////       | ////       |
| P       |            |            | test M. W. |            |            |
| Pb      | ////       | both tests |            |            | ////       |
| Rb      |            | both tests | test M. W. | test M. W. |            |
| Se      | both tests | test M. W. |            |            | both tests |
| Sn      | ////       | ////       | ////       | ////       | ////       |
| Sr      | ////       |            |            | test t     | test t     |
| Ta      | ////       | ////       | ////       | ////       | ////       |
| Ti      | ////       |            |            |            |            |
| Tl      | ////       | ////       | ////       | ////       | ////       |
| V       | ////       |            | ////       | ////       | ////       |
| Zn      |            |            | test M. W. |            | test t     |
| Zr      | ////       |            |            |            |            |

//// no test can be performed    □ both test negative    ■ test positive (test name)

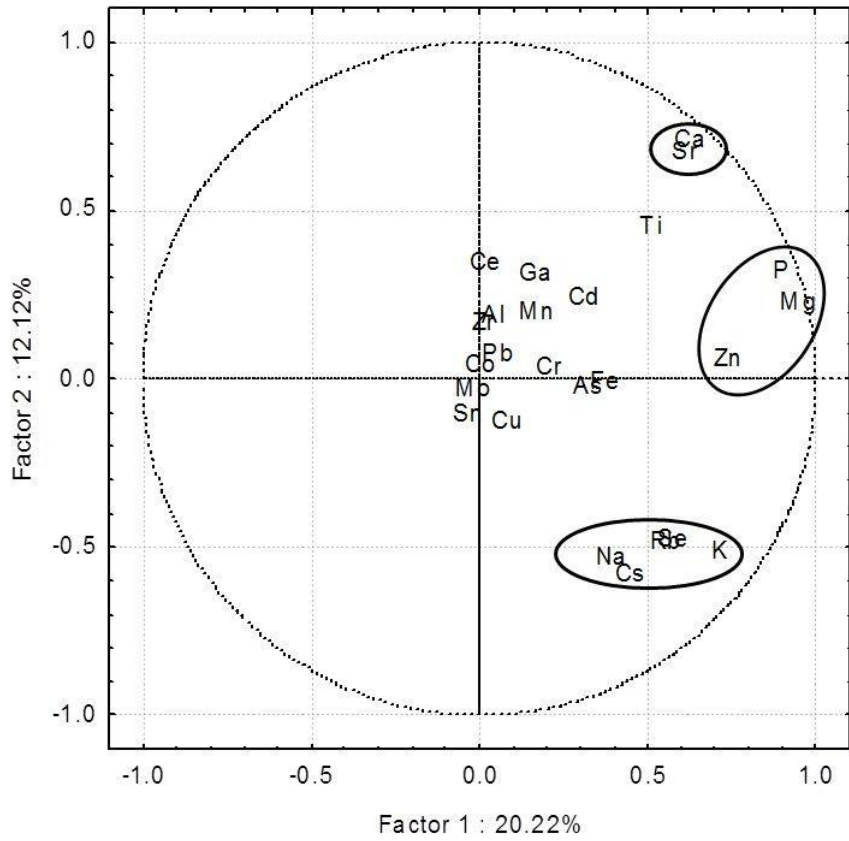

Figure S1: Loadings in the analysis of placentas.

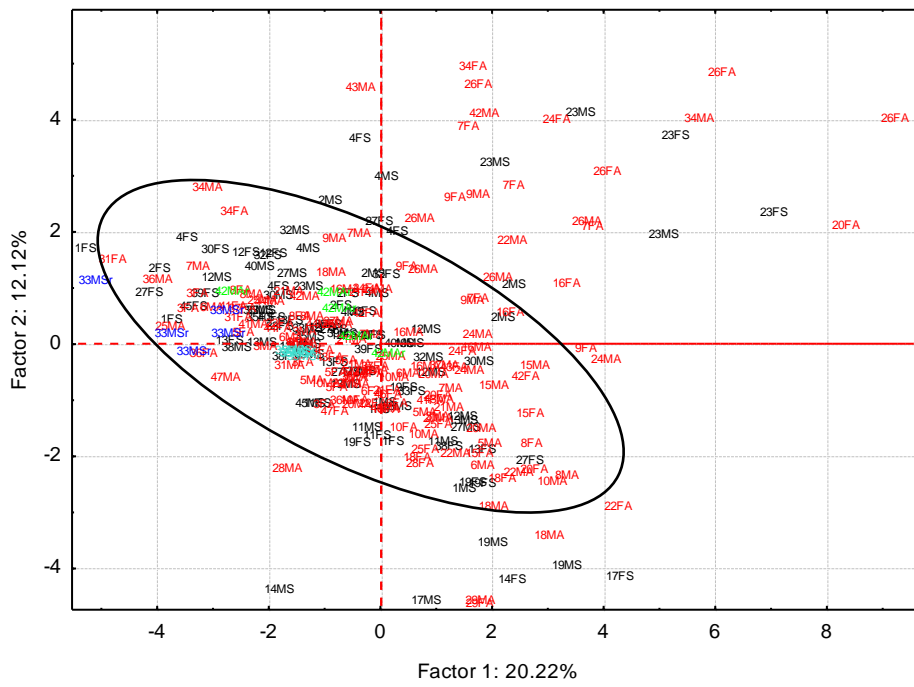

Figure S2: PCA in the analysis of placentas. Black = control women, Red = diabetic women, Light blue = instrumental error, Blue = procedure error, Green = procedure + sampling error.
